# Supplementary material
Source: publisher site journal article supplement (https://www.spandidos-publications.com/4759/downloadSupplementary)
Supplement: Supplementary file 1 [file downloadSupplementary]

## Sheet: supplementary2.cell.ratio
Table SII The frequency of cells for each celltype in the two sequencing methods
celltype	single_cell_seq	single_nucleus_seq
B cell	0.0435071	0.00776914
Endothelial Cell	0.02308	0.0941018
Fibroblast	0.00756068	0.000317108
Hepatocyte	0.0578326	0.758126
Macrophage	0.0553124	0.0422546
NK cell	0.057302	0.00166482
T cell	0.755405	0.0957666
